# Supplementary material for: Automated Prediction of the Response to Neoadjuvant Chemoradiotherapy in Patients Affected by Rectal Cancer
Source: MDPI journal article supplement (doi:10.3390/cancers14092231), 2022-04-29
Supplement: s1 [file s1]

# Automated Prediction of the Response to Neoadjuvant Chemoradiotherapy in Patients Affected by Rectal Cancer

Giuseppe Filitto <sup>1,†</sup>, Francesca Coppola <sup>2,3,†</sup>, Nico Curti <sup>4,5,\*</sup>, Enrico Giampieri <sup>4,\*</sup>, Daniele Dall'Olio <sup>6</sup>, Alessandra Merlotti <sup>6</sup>, Arrigo Cattabriga <sup>2</sup>, Maria Adriana Cocozza <sup>2</sup>, Makoto Taninokuchi Tomassoni <sup>2</sup>, Daniel Remondini <sup>5,6</sup>, Luisa Pierotti <sup>7</sup>, Lidia Strigari <sup>8</sup>, Dajana Cuicchi <sup>9</sup>, Alessandra Guido <sup>10</sup>, Karim Rihawi <sup>11</sup>, Antonietta D'Errico <sup>12</sup>, Francesca Di Fabio <sup>11</sup>, Gilberto Poggioli <sup>9</sup>, Alessio Giuseppe Morganti <sup>10</sup>, Luigi Ricciardiello <sup>13</sup>, Rita Golfieri <sup>2,‡</sup> and Gastone Castellani <sup>1,‡</sup>

## File S1:

The U-Net model discussed in this study was implemented using the Tensorflow [25] python package. To improve learning efficiency, the MRI scans were scaled into the range [0, 1] before being fed into the models. The training procedure was carried out using batches of size 4 scans, for 150 epochs. The model was trained using the Adam optimization algorithm with a learning rate of  $10^{-3}$ . The model was trained using 391 MRI slices (training set) and validated on 97 images (validation set). The SVC classifier used to predict the TRG was implemented using the scikit-learn [24] python package. The model was trained using a regularization parameter equal to 100 and a radial basis function kernel. The code developed for the reproducibility of the results is publicly available on Github [22].
